# Supplementary material for: Sarcopenia Is Associated With Development of Acute-on-Chronic Liver Failure in Decompensated Liver Cirrhosis Receiving Transjugular Intrahepatic Portosystemic Shunt
Source: PubMed Central journal article supplement — Clin Transl Gastroenterol. 2019 Apr 30;10(4):e00025. doi: 10.14309/ctg.0000000000000025 (PMC6602782; doi:10.14309/ctg.0000000000000025), 2019-04-30

Supplemental Table 1. General characteristics at follow-up stratified for unisex sarcopenia classification

|                   | Parameter  | Follow Up        |                 | p            |
|-------------------|------------|------------------|-----------------|--------------|
|                   |            | no sarcopenia    | sarcopenia      |              |
| <b>Scores</b>     | MELD       | 12(6-40)         | 15(6-40)        | <b>0.037</b> |
|                   | MELD-Na    | 13(6-40)         | 16(6-40)        | <b>0.013</b> |
|                   | Child-Pugh | 6(5-13)          | 8(5-13)         | <b>0.004</b> |
|                   | CLIF-C-AD  | 45.4(26.8-100.8) | 52.1(29.3-85.0) | <0.001       |
| <b>Laboratory</b> | Sodium     | 139(126-146)     | 138(122-163)    | 0.087        |
|                   | Creatinine | 1.0(0.2-5.85)    | 1.0(0.4-10.0)   | 0.672        |
|                   | Bilirubin  | 1.8(0.2-31.8)    | 2.2(0.3-33.9)   | 0.216        |
|                   | gGT        | 87(15-3685)      | 143(22-667)     | 0.063        |
|                   | AST        | 40.5(10-37186)   | 52(13-6174)     | 0.125        |
|                   | ALT        | 29(2-6030)       | 33(7-1086)      | 0.781        |
|                   | Albumin    | 33.1(2.0-47.9)   | 29.5(3.8-48.0)  | 0.064        |
|                   | INR        | 1.2(0.9-5.7)     | 1.3(0.9-3.9)    | <b>0.009</b> |
|                   | WBC G/l    | 5.8(2.5-22.1)    | 8.2(0.5-272)    | <b>0.002</b> |
|                   | Hb [mg/dl] | 11.4(6.4-24.0)   | 10.7(5.8-16.5)  | <b>0.008</b> |
|                   | Platelets  | 133(10-430)      | 118(2-399)      | 0.399        |

Supplemental Table 2. Diagnostic parameters of general TPMT/height and gender-specific classification for 1-year mortality and development of ACLF at 1-year follow-up

| diagnostic parameter |                                | c-index | Sensitivity [%] | Specificity [%] | Positive predictive value [%] | Negative predictive value [%] | Diagnostic accuracy [%] |
|----------------------|--------------------------------|---------|-----------------|-----------------|-------------------------------|-------------------------------|-------------------------|
| 1y-mortality         | Unisex classification          | 0.646   | 73              | 56              | 85                            | 37                            | 69                      |
|                      | Gender-specific classification | 0.680   | 80              | 56              | 87                            | 44                            | 75                      |
| 1y-ACLF              | Unisex classification          | 0.660   | 73              | 58              | 86                            | 38                            | 70                      |
|                      | Gender-specific classification | 0.726   | 82              | 63              | 89                            | 50                            | 78                      |

Supplemental Table 3. Uni- and multivariate Cox regression analysis for development of fatal ACLF at 1-year follow-up

| 1-year fatal ACLF<br>Parameter        | univariate Cox regression |       |       |        | multivariate Cox regression |       |       |       |
|---------------------------------------|---------------------------|-------|-------|--------|-----------------------------|-------|-------|-------|
|                                       | p                         | HR    | CI    |        | p                           | HR    | CI    |       |
| age [years]                           | 0.028                     | 1.034 | 1.004 | 1.066  |                             |       |       |       |
| gender                                | 0.218                     |       |       |        |                             |       |       |       |
| <b>TPMT / height [mm/m]</b>           | 0.000                     | 0.808 | 0.741 | 0.881  | <0.001                      | 0.849 | 0.781 | 0.924 |
| unisex classification                 | <0.001                    | 3.707 | 1.883 | 7.300  |                             |       |       |       |
| <b>gender-specific classification</b> | <0.001                    | 6.321 | 3.138 | 12.732 | <0.001                      | 1.105 | 1.058 | 1.153 |
| hepatic encephalopathy at baseline    | 0.075                     |       |       |        |                             |       |       |       |
| ascites at baseline                   | 0.063                     |       |       |        |                             |       |       |       |
| Child-Pugh at baseline                | 0.003                     | 1.350 | 1.108 | 1.645  |                             |       |       |       |
| MELD at baseline                      | <0.001                    | 1.114 | 1.063 | 1.168  |                             |       |       |       |
| MELD-Na at baseline                   | <0.001                    | 1.110 | 1.059 | 1.163  |                             |       |       |       |
| <b>CLIF-C-AD at baseline</b>          | <0.001                    | 1.111 | 1.069 | 1.155  | <0.001                      | 1.097 | 1.053 | 1.144 |
| sodium at baseline [mmol/l]           | 0.165                     |       |       |        |                             |       |       |       |
| creatinine at baseline [mg/dl]        | 0.008                     | 1.350 | 1.083 | 1.683  |                             |       |       |       |
| bilirubin at baseline [mg/dl]         | 0.003                     | 1.149 | 1.048 | 1.259  |                             |       |       |       |
| INR at baseline                       | 0.023                     | 5.225 | 1.253 | 21.791 |                             |       |       |       |

Supplemental Table 4. Uni- and multivariate Cox regression analysis for development of non-fatal ACLF at 2-year follow-up

| 2-year non-fatal ACLF<br>Parameter    | univariate Cox regression |       |              | multivariate Cox regression |       |              |
|---------------------------------------|---------------------------|-------|--------------|-----------------------------|-------|--------------|
|                                       | p                         | HR    | CI           | p                           | HR    | CI           |
| <b>age [years]</b>                    | 0.009                     | 1.087 | 1.021 1.157  | 0.020                       | 1.078 | 1.012 1.149  |
| gender                                | 0.774                     |       |              |                             |       |              |
| <b>TPMT / height [mm/m]</b>           | 0.002                     | 0.768 | 0.650 0.906  | 0.006                       | 0.754 | 0.618 0.921  |
| unisex classification                 | 0.064                     |       |              |                             |       |              |
| <b>gender-specific classification</b> | 0.014                     | 4.821 | 1.383 16.807 | 0.031                       | 3.998 | 1.132 14.120 |
| hepatic encephalopathy at baseline    | 0.413                     |       |              |                             |       |              |
| ascites at baseline                   | 0.588                     |       |              |                             |       |              |
| Child-Pugh at baseline                | 0.616                     |       |              |                             |       |              |
| MELD at baseline                      | 0.721                     |       |              |                             |       |              |
| MELD-Na at baseline                   | 0.904                     |       |              |                             |       |              |
| CLIF-C-AD at baseline                 | 0.487                     |       |              |                             |       |              |
| sodium at baseline [mmol/l]           | 0.792                     |       |              |                             |       |              |
| creatinine at baseline [mg/dl]        | 0.856                     |       |              |                             |       |              |
| bilirubin at baseline [mg/dl]         | 0.684                     |       |              |                             |       |              |
| INR at baseline                       | 0.498                     |       |              |                             |       |              |

Supplemental figure 1.

a)

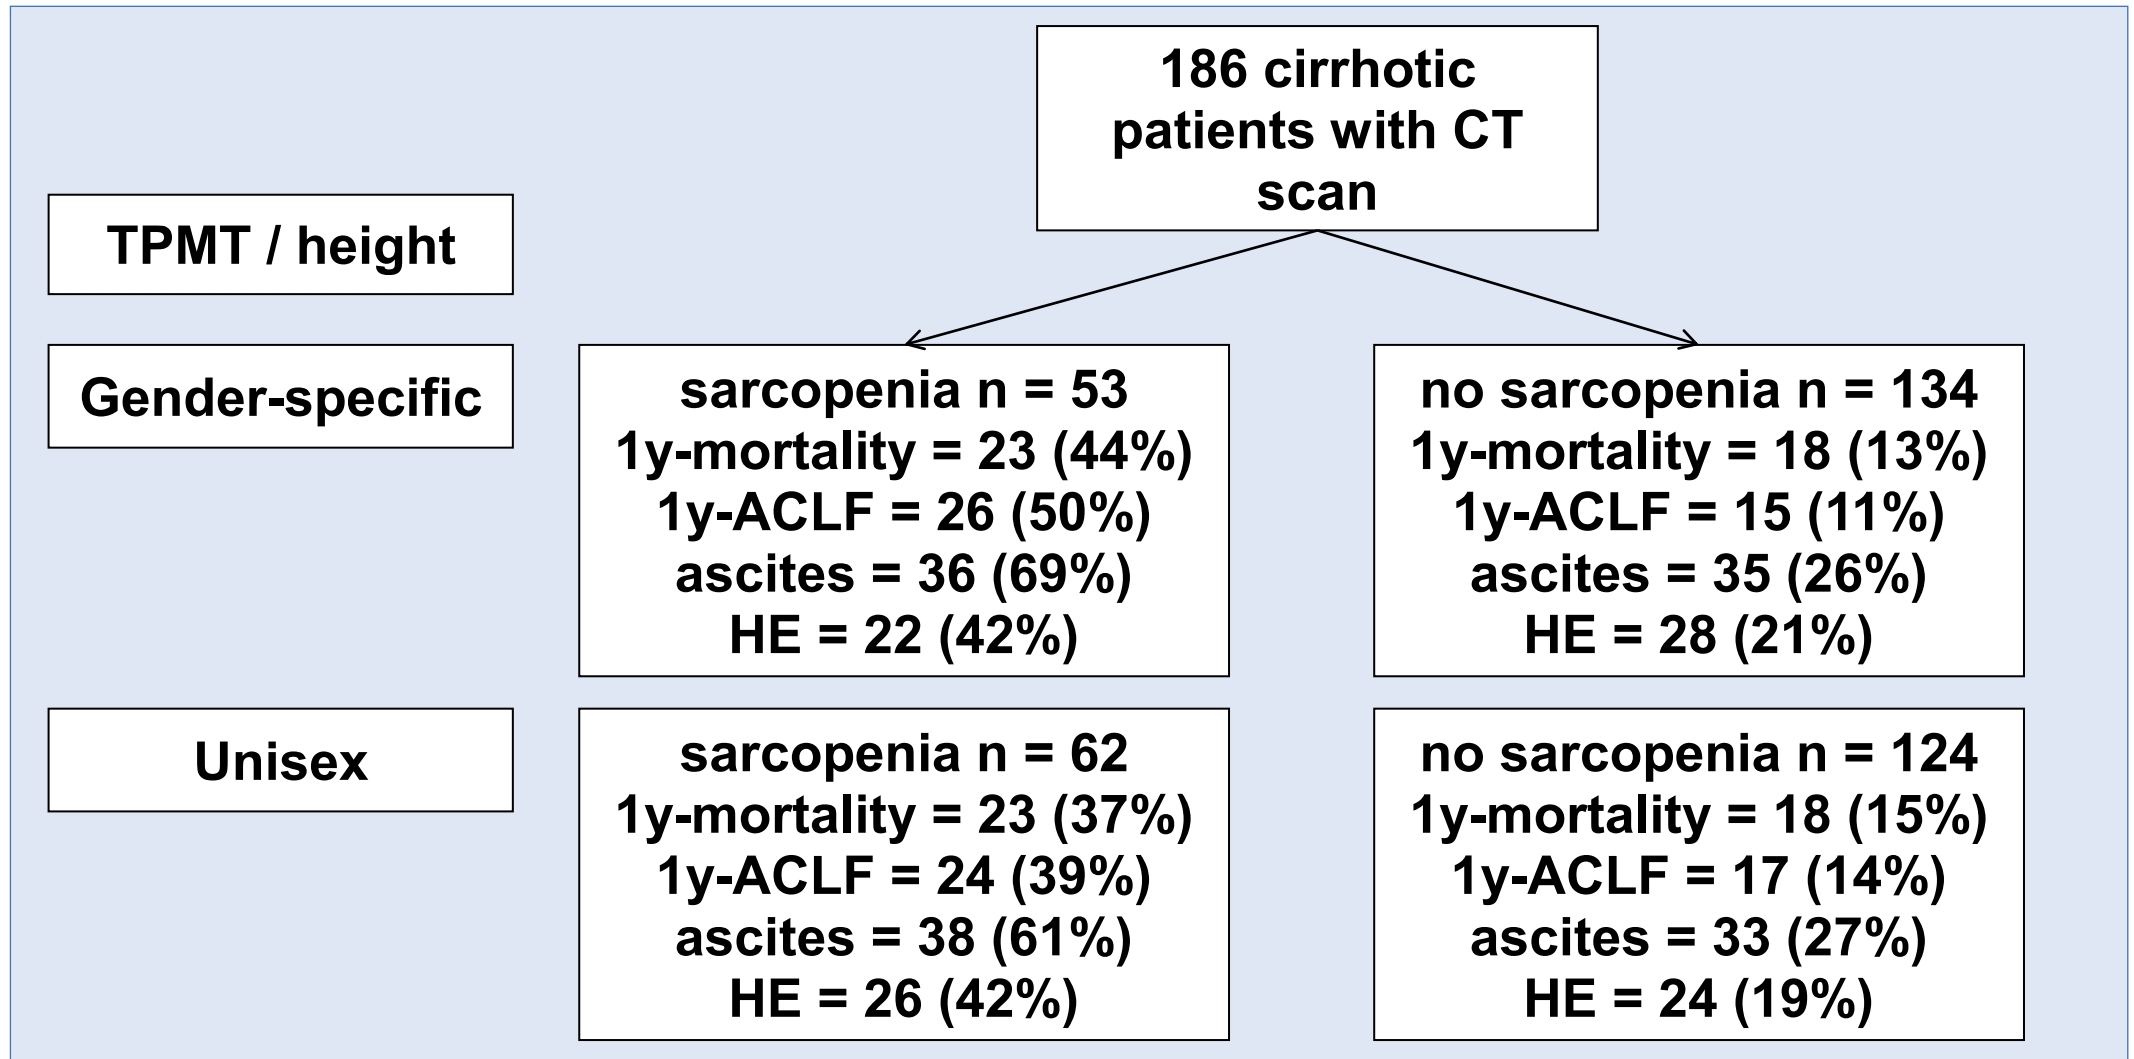

b)

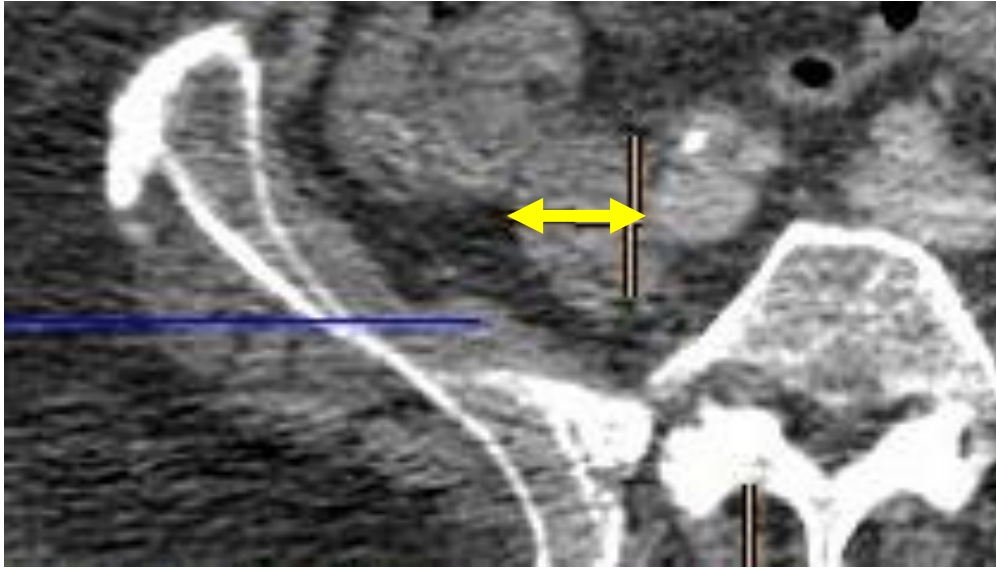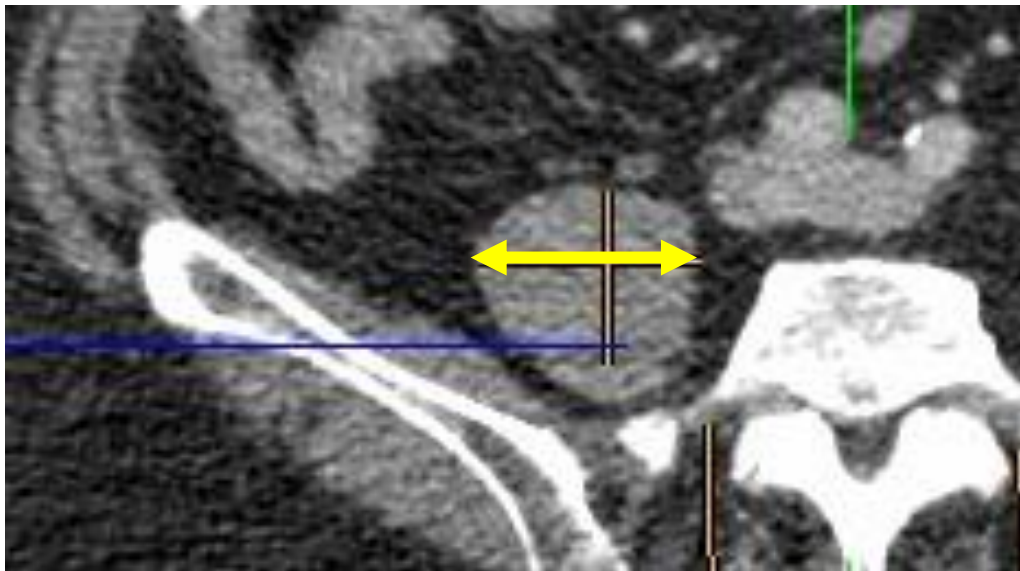

c)

### ROC analysis of TPMT/height for 1-year survival

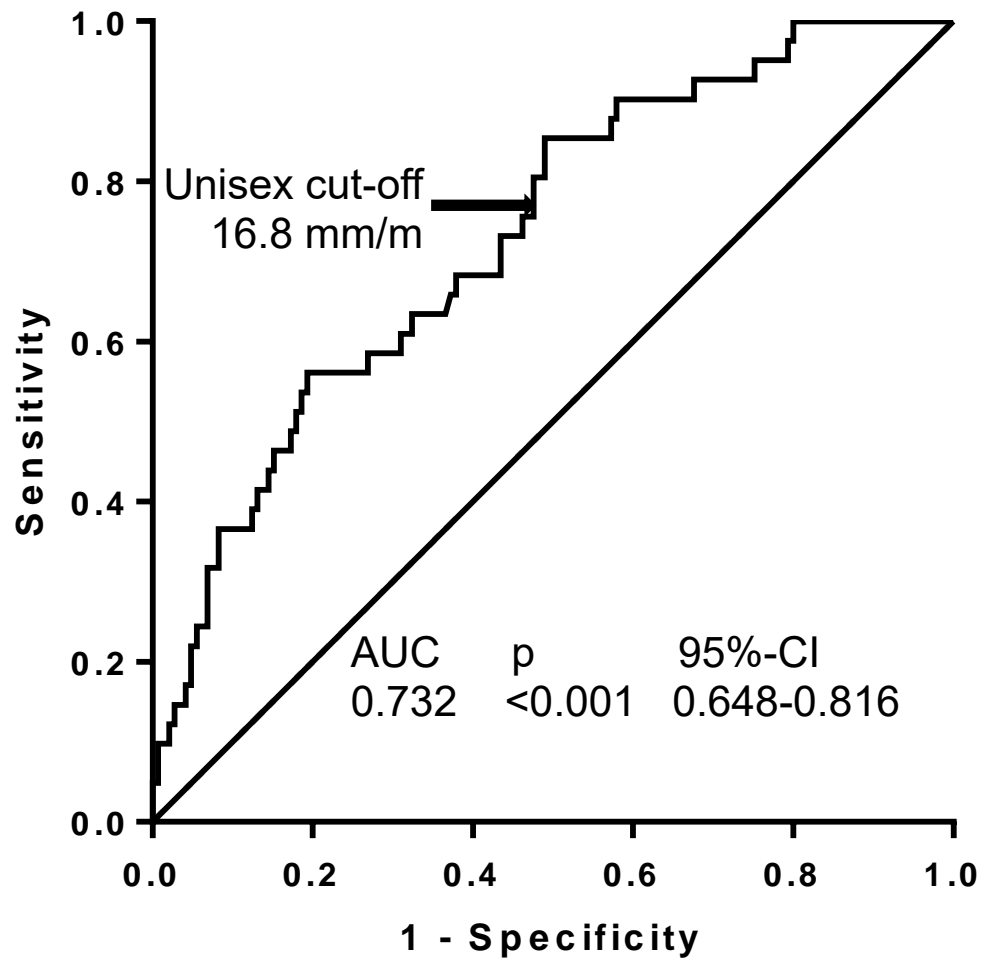

d)

### ROC analysis of TPMT/height for 1-year survival for male

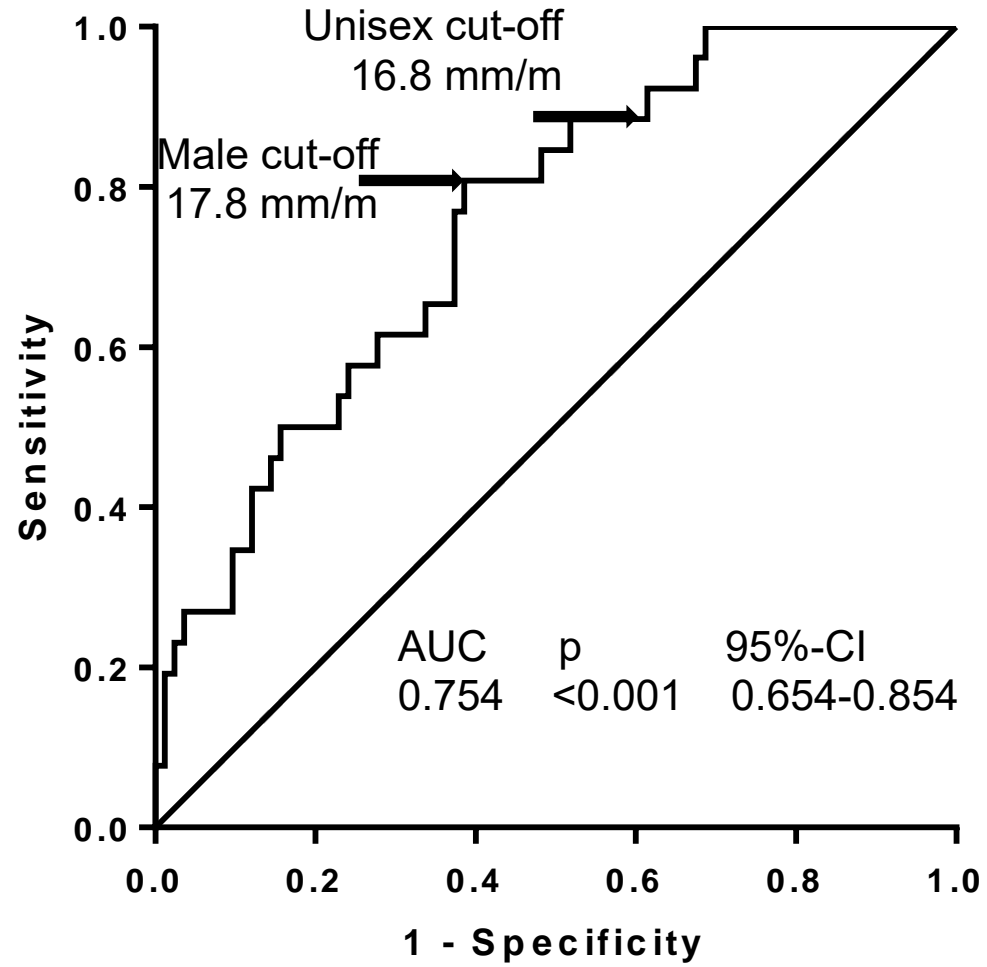



e)

### ROC analysis of TPMT/height for 1-year survival for female

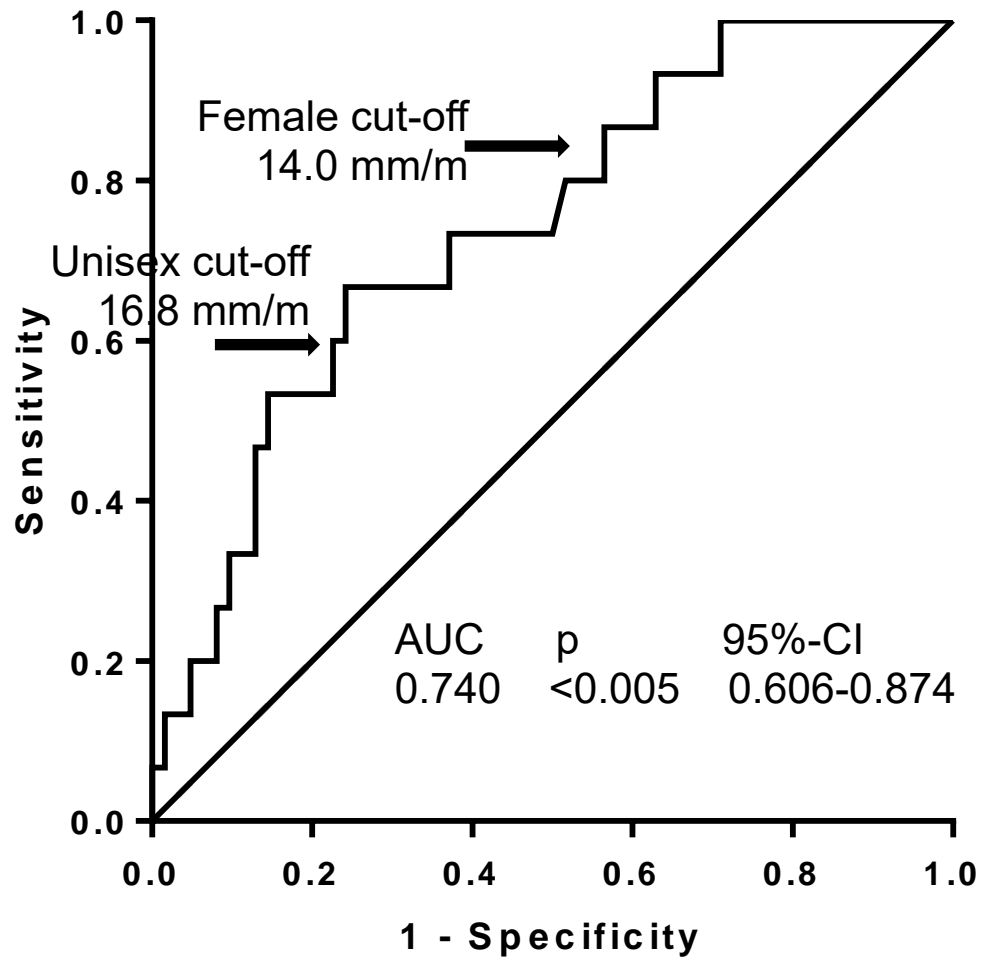

Supplement: ct9-10-e00025-s001.pdf [file ct9-10-e00025-s001.pdf]
